# Supplementary material
Source: PubMed Central journal article supplement (PMC3511996)
Supplement: mmc1.pdf [file mmc1.pdf]

## Supplemental Data

### Loss of SUFU Function in Familial Multiple Meningioma

Mervi Aavikko, Song-Ping Li, Silva Saarinen, Pia Alhopuro, Eevi Kaasinen, Ekaterina Morgunova, Yilong Li, Kari Vesanen, Miriam J. Smith, D. Gareth R. Evans, Minna Pöyhönen, Anne Kiuru, Anssi Auvinen, Lauri A. Aaltonen, Jussi Taipale, and Pia Vahteristo

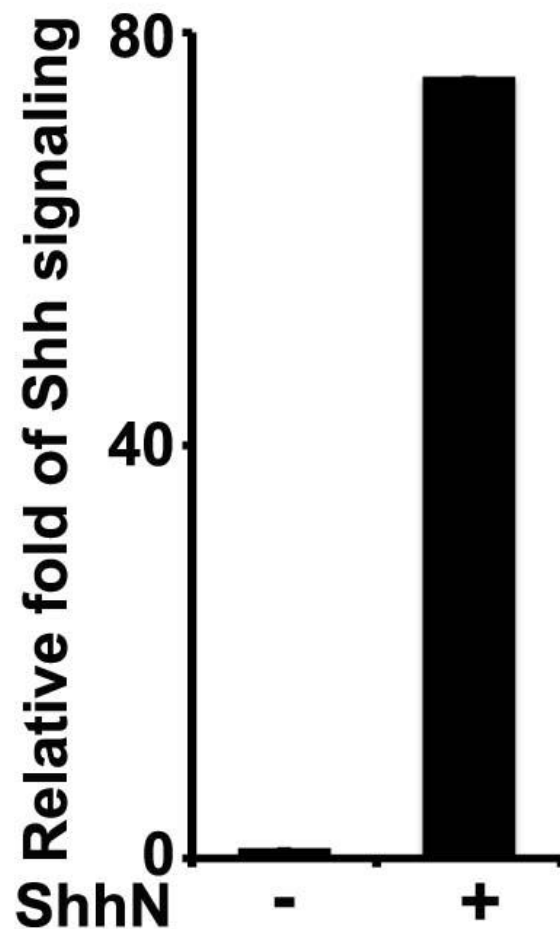

**Figure S1. Efficiency of ShhN Conditioned Medium**

The biological activity of the ShhN conditioned medium was tested by transfecting Hh pathway specific reporter and control reporter to C3H10T1/2 cells, and incubating the cells with ShhN conditioned medium for two days. Note that ShhN conditioned medium treated cells display much higher luciferase activity than untreated cells. Error bars indicate one standard deviation (duplicate samples).

**Table S1. Linked Regions with Positive LOD Scores in Meningioma Family 1**

| <b>Chr</b> | <b>Start Marker</b> | <b>End Marker</b> | <b>Start bp</b> | <b>End bp</b> | <b>Min LOD</b> | <b>Max LOD</b> | <b>Average LOD</b> | <b>Length cM</b> | <b>Length bp</b> |
|------------|---------------------|-------------------|-----------------|---------------|----------------|----------------|--------------------|------------------|------------------|
| 1          | rs7545940           | rs1475629         | 2299627         | 59608025      | 0.095          | 0.432          | 0.267              | 83.964           | 57308398         |
| 1          | rs7555023           | rs6704311         | 225854495       | 249210707     | 0.102          | 0.432          | 0.338              | 46.711           | 23356212         |
| 1          | rs1200082           | rs659580          | 169160726       | 170633896     | 0.007          | 0.195          | 0.187              | 2.241            | 1473170          |
| 1          | rs1887467           | rs4847031         | 102407313       | 105582135     | 0.011          | 0.197          | 0.190              | 2.036            | 3174822          |
| 1          | rs429201            | rs856099          | 158194899       | 158891391     | 0.004          | 0.195          | 0.176              | 1.253            | 696492           |
| 1          | rs3934593           | rs10800409        | 161358828       | 162260715     | 0.020          | 0.212          | 0.193              | 1.081            | 901887           |
| 1          | rs10916197          | rs1340865         | 224230307       | 225631404     | 0.012          | 0.195          | 0.191              | 1.018            | 1401097          |
| 1          | rs6428606           | rs12125484        | 91480823        | 92812196      | 0.009          | 0.195          | 0.191              | 0.948            | 1331373          |
| 1          | rs1487492           | rs4589114         | 188162030       | 188683442     | 0.045          | 0.195          | 0.170              | 0.369            | 521412           |
| 1          | rs2421809           | rs2206542         | 171371998       | 171788782     | 0.062          | 0.195          | 0.182              | 0.311            | 416784           |
| 1          | rs10801032          | rs6659757         | 188901145       | 189846235     | 0.057          | 0.258          | 0.225              | 0.306            | 945090           |
| 1          | rs2206510           | rs982875          | 176513537       | 177208980     | 0.001          | 0.019          | 0.017              | 0.290            | 695443           |
| 1          | rs1840246           | rs2029768         | 77835507        | 78014042      | 0.001          | 0.112          | 0.095              | 0.093            | 178535           |
| 2          | rs6721317           | rs7587759         | 151574522       | 199657020     | 0.029          | 0.432          | 0.214              | 36.234           | 48082498         |
| 2          | rs3115376           | rs12469535        | 231845762       | 243044147     | 0.036          | 0.195          | 0.195              | 24.769           | 11198385         |
| 2          | rs4852700           | rs10496388        | 70921539        | 105549404     | 0.049          | 0.432          | 0.252              | 24.694           | 34627865         |
| 2          | rs2216174           | rs1872603         | 7992985         | 8561739       | 0.009          | 0.195          | 0.184              | 2.259            | 568754           |
| 2          | rs1384741           | rs1393810         | 67453172        | 68178609      | 0.008          | 0.195          | 0.182              | 1.740            | 725437           |
| 2          | rs1975305           | rs6713772         | 122207005       | 123216847     | 0.003          | 0.195          | 0.186              | 1.448            | 1009842          |
| 2          | rs7580611           | rs1458281         | 209467044       | 211258344     | 0.048          | 0.195          | 0.186              | 0.918            | 1791300          |
| 2          | rs765253            | rs1965391         | 33708491        | 34237472      | 0.061          | 0.196          | 0.184              | 0.914            | 528981           |
| 2          | rs2287059           | rs4669646         | 10717806        | 11061715      | 0.020          | 0.195          | 0.182              | 0.815            | 343909           |
| 2          | rs7588415           | rs2879163         | 21123661        | 21816746      | 0.003          | 0.195          | 0.180              | 0.788            | 693085           |
| 2          | rs6712836           | rs840976          | 65425014        | 65707760      | 0.017          | 0.148          | 0.133              | 0.573            | 282746           |
| 2          | rs950233            | rs1208081         | 201594185       | 202501448     | 0.009          | 0.154          | 0.130              | 0.519            | 907263           |
| 2          | rs2581087           | rs4669803         | 12057524        | 12198305      | 0.007          | 0.139          | 0.115              | 0.399            | 140781           |

|   |            |            |           |           |       |       |       |        |          |
|---|------------|------------|-----------|-----------|-------|-------|-------|--------|----------|
| 2 | rs6759476  | rs208784   | 230437369 | 230562414 | 0.083 | 0.195 | 0.185 | 0.329  | 125045   |
| 3 | rs1928565  | rs6762405  | 67580121  | 133156692 | 0.008 | 0.432 | 0.197 | 48.324 | 65576571 |
| 3 | rs6549924  | rs6768998  | 29357063  | 43718270  | 0.014 | 0.204 | 0.195 | 15.006 | 14361207 |
| 3 | rs7647261  | rs3844057  | 193938611 | 196462501 | 0.019 | 0.195 | 0.193 | 5.312  | 2523890  |
| 3 | rs9681213  | rs2619566  | 66894     | 2624938   | 0.075 | 0.195 | 0.195 | 5.260  | 2558044  |
| 3 | rs7615158  | rs899348   | 140225492 | 140828801 | 0.038 | 0.192 | 0.169 | 1.042  | 603309   |
| 3 | rs13315015 | rs2717302  | 181515848 | 182392108 | 0.017 | 0.195 | 0.170 | 1.026  | 876260   |
| 3 | rs696066   | rs3774007  | 189672468 | 190115611 | 0.006 | 0.195 | 0.180 | 0.763  | 443143   |
| 3 | rs3796343  | rs6807359  | 52324169  | 53179754  | 0.024 | 0.195 | 0.170 | 0.693  | 855585   |
| 3 | rs250403   | rs370477   | 8920281   | 9067597   | 0.024 | 0.195 | 0.161 | 0.452  | 147316   |
| 3 | rs12631821 | rs2127521  | 65033653  | 65382140  | 0.019 | 0.195 | 0.180 | 0.356  | 348487   |
| 3 | rs1995242  | rs1983011  | 177196081 | 177376886 | 0.005 | 0.027 | 0.020 | 0.317  | 180805   |
| 3 | rs6439563  | rs6808137  | 134928717 | 135310068 | 0.012 | 0.187 | 0.176 | 0.299  | 381351   |
| 3 | rs7651446  | rs10936057 | 156406997 | 156758657 | 0.003 | 0.160 | 0.136 | 0.240  | 351660   |
| 3 | rs3732530  | rs9826195  | 47618953  | 48433635  | 0.050 | 0.195 | 0.188 | 0.221  | 814682   |
| 3 | rs6766822  | rs1319985  | 24778690  | 24875084  | 0.001 | 0.004 | 0.004 | 0.080  | 96394    |
| 4 | rs4690284  | rs524675   | 73508     | 13966851  | 0.002 | 0.432 | 0.355 | 26.993 | 13893343 |
| 4 | rs11728123 | rs7660745  | 25983887  | 38974458  | 0.055 | 0.432 | 0.225 | 13.676 | 12990571 |
| 4 | rs830835   | rs13120250 | 186909596 | 190927132 | 0.080 | 0.432 | 0.219 | 10.599 | 4017536  |
| 4 | rs7662456  | rs10034036 | 64214915  | 75629633  | 0.074 | 0.432 | 0.210 | 8.037  | 11414718 |
| 4 | rs2719934  | rs1583540  | 42347473  | 43115315  | 0.002 | 0.386 | 0.207 | 0.627  | 767842   |
| 4 | rs4618360  | rs756334   | 158039710 | 158689938 | 0.005 | 0.091 | 0.079 | 0.530  | 650228   |
| 4 | rs4473628  | rs7698045  | 47752554  | 48240043  | 0.028 | 0.195 | 0.180 | 0.154  | 487489   |
| 4 | rs10029490 | rs1032133  | 19740879  | 20053908  | 0.007 | 0.052 | 0.046 | 0.134  | 313029   |
| 4 | rs6827817  | rs13144424 | 88330987  | 88474171  | 0.099 | 0.169 | 0.161 | 0.109  | 143184   |
| 5 | rs186893   | rs163129   | 8473747   | 78279820  | 0.028 | 0.432 | 0.271 | 71.957 | 69806073 |
| 5 | rs2085448  | rs1279912  | 167885622 | 180690937 | 0.191 | 0.432 | 0.263 | 30.485 | 12805315 |
| 5 | rs6893150  | rs1971335  | 80509936  | 81986928  | 0.056 | 0.195 | 0.190 | 2.255  | 1476992  |
| 5 | rs10515889 | rs1799542  | 164546897 | 165756043 | 0.003 | 0.195 | 0.184 | 1.843  | 1209146  |
| 5 | rs6594693  | rs1482377  | 112516709 | 113225701 | 0.025 | 0.195 | 0.183 | 0.492  | 708992   |

|   |            |            |           |           |       |       |       |        |          |
|---|------------|------------|-----------|-----------|-------|-------|-------|--------|----------|
| 5 | rs1835919  | rs157350   | 155613491 | 156139569 | 0.049 | 0.195 | 0.184 | 0.353  | 526078   |
| 6 | rs9389549  | rs12213906 | 138343019 | 170909002 | 0.168 | 0.414 | 0.204 | 48.700 | 32565983 |
| 6 | rs1267514  | rs10485346 | 14691612  | 33866059  | 0.194 | 0.432 | 0.205 | 19.972 | 19174447 |
| 6 | rs1149305  | rs9372110  | 105745814 | 106317196 | 0.007 | 0.195 | 0.171 | 0.804  | 571382   |
| 6 | rs913533   | rs10458159 | 3376492   | 3658852   | 0.106 | 0.195 | 0.187 | 0.730  | 282360   |
| 6 | rs4945909  | rs11153496 | 112999076 | 115005346 | 0.038 | 0.195 | 0.186 | 0.701  | 2006270  |
| 6 | rs6915644  | rs851854   | 65816812  | 67098218  | 0.033 | 0.195 | 0.186 | 0.647  | 1281406  |
| 6 | rs9396386  | rs17467260 | 57580780  | 63223191  | 0.029 | 0.109 | 0.103 | 0.489  | 5642411  |
| 7 | rs6593113  | rs1052990  | 54087762  | 116148370 | 0.022 | 0.432 | 0.212 | 46.789 | 62060608 |
| 7 | rs7788285  | rs4726774  | 116867295 | 145566532 | 0.009 | 0.417 | 0.204 | 30.291 | 28699237 |
| 7 | rs4988515  | rs917131   | 45932600  | 48868672  | 0.019 | 0.375 | 0.195 | 2.187  | 2936072  |
| 7 | rs7793793  | rs12111597 | 33070175  | 34870001  | 0.029 | 0.195 | 0.192 | 1.046  | 1799826  |
| 7 | rs1035147  | rs886890   | 12094966  | 12665739  | 0.043 | 0.194 | 0.172 | 0.896  | 570773   |
| 7 | rs217556   | rs6461170  | 14908792  | 15397643  | 0.025 | 0.195 | 0.180 | 0.774  | 488851   |
| 7 | rs255112   | rs12670991 | 30737133  | 31089447  | 0.008 | 0.170 | 0.146 | 0.754  | 352314   |
| 7 | rs10951453 | rs10848    | 35994201  | 36339126  | 0.022 | 0.195 | 0.179 | 0.662  | 344925   |
| 7 | rs2391415  | rs739898   | 27359793  | 27913060  | 0.023 | 0.195 | 0.167 | 0.604  | 553267   |
| 7 | rs1362363  | rs1641215  | 29511689  | 29661486  | 0.017 | 0.164 | 0.147 | 0.347  | 149797   |
| 7 | rs10486480 | rs6968828  | 26872652  | 27223563  | 0.044 | 0.195 | 0.177 | 0.254  | 350911   |
| 7 | rs17135206 | rs6974056  | 52655552  | 52952144  | 0.010 | 0.184 | 0.164 | 0.233  | 296592   |
| 7 | rs7806592  | rs12718123 | 53998     | 200682    | 0.188 | 0.195 | 0.194 | 0.215  | 146684   |
| 7 | rs1476689  | rs10499549 | 22265585  | 22390479  | 0.024 | 0.067 | 0.057 | 0.140  | 124894   |
| 8 | rs11136463 | rs7842063  | 2020224   | 83738448  | 0.015 | 0.432 | 0.263 | 90.265 | 81718224 |
| 8 | rs7841283  | rs7822726  | 131668278 | 146274708 | 0.028 | 0.207 | 0.195 | 26.002 | 14606430 |
| 8 | rs7823009  | rs12548836 | 125199582 | 125529355 | 0.055 | 0.156 | 0.144 | 0.579  | 329773   |
| 8 | rs4397371  | rs6470816  | 130701417 | 131349715 | 0.003 | 0.100 | 0.091 | 0.351  | 648298   |
| 9 | rs7856900  | rs10512124 | 19475651  | 84950712  | 0.006 | 0.432 | 0.199 | 40.554 | 65475061 |
| 9 | rs2361093  | rs2475335  | 606676    | 10260263  | 0.071 | 0.369 | 0.198 | 22.514 | 9653587  |
| 9 | rs4978532  | rs7048129  | 110416006 | 115245875 | 0.010 | 0.364 | 0.203 | 6.283  | 4829869  |
| 9 | rs7043796  | rs7037313  | 133070040 | 134164493 | 0.007 | 0.195 | 0.188 | 1.771  | 1094453  |

|    |            |            |           |           |       |       |       |        |          |
|----|------------|------------|-----------|-----------|-------|-------|-------|--------|----------|
| 9  | rs4842136  | rs7864699  | 137489483 | 137724371 | 0.021 | 0.195 | 0.180 | 1.308  | 234888   |
| 9  | rs1942476  | rs1927702  | 15362057  | 15986716  | 0.003 | 0.150 | 0.120 | 1.062  | 624659   |
| 9  | rs6479562  | rs6479604  | 97429160  | 98110248  | 0.040 | 0.191 | 0.180 | 0.695  | 681088   |
| 9  | rs479600   | rs2995211  | 104202803 | 104709020 | 0.038 | 0.194 | 0.167 | 0.464  | 506217   |
| 9  | rs7869160  | rs2382444  | 13968260  | 14221591  | 0.032 | 0.177 | 0.159 | 0.426  | 253331   |
| 9  | rs1341062  | rs1332712  | 18519566  | 18632128  | 0.007 | 0.068 | 0.062 | 0.294  | 112562   |
| 9  | rs10511667 | rs2171957  | 18989696  | 19086979  | 0.010 | 0.035 | 0.031 | 0.254  | 97283    |
| 10 | rs538037   | rs2803804  | 29441743  | 119091401 | 0.011 | 0.431 | 0.196 | 82.768 | 89649658 |
| 10 | rs10830183 | rs11101905 | 128774872 | 135434303 | 0.087 | 0.432 | 0.240 | 21.123 | 6659431  |
| 10 | rs1149975  | rs6602387  | 9341029   | 10034807  | 0.062 | 0.191 | 0.174 | 1.217  | 693778   |
| 10 | rs3740563  | rs10749330 | 121095400 | 121711232 | 0.018 | 0.195 | 0.179 | 0.945  | 615832   |
| 10 | rs11251048 | rs7079384  | 2120407   | 2692656   | 0.067 | 0.195 | 0.187 | 0.908  | 572249   |
| 10 | rs7906287  | rs11253471 | 135853    | 903950    | 0.179 | 0.196 | 0.195 | 0.710  | 768097   |
| 10 | rs10764124 | rs4338432  | 19963583  | 20458202  | 0.003 | 0.032 | 0.029 | 0.344  | 494619   |
| 11 | rs2584834  | rs7104859  | 20043439  | 95824593  | 0.005 | 0.432 | 0.237 | 64.694 | 75781154 |
| 11 | rs4300402  | rs4540845  | 131219868 | 134930689 | 0.047 | 0.430 | 0.205 | 9.050  | 3710821  |
| 11 | rs2075292  | rs7083     | 116732512 | 117156552 | 0.018 | 0.195 | 0.187 | 0.900  | 424040   |
| 11 | rs4073915  | rs4757788  | 18796480  | 19339176  | 0.037 | 0.195 | 0.178 | 0.753  | 542696   |
| 11 | rs4938784  | rs10789859 | 111413465 | 111960533 | 0.046 | 0.194 | 0.174 | 0.680  | 547068   |
| 11 | rs12281062 | rs1176754  | 113494864 | 113827650 | 0.010 | 0.039 | 0.034 | 0.509  | 332786   |
| 11 | rs1275097  | rs666135   | 123543428 | 124208977 | 0.002 | 0.023 | 0.013 | 0.359  | 665549   |
| 11 | rs10892201 | rs4938499  | 117848292 | 118162496 | 0.057 | 0.195 | 0.184 | 0.281  | 314204   |
| 11 | rs9326314  | rs7110790  | 101433161 | 101909363 | 0.107 | 0.188 | 0.181 | 0.090  | 476202   |
| 12 | rs1476796  | rs7975069  | 126769933 | 133778796 | 0.107 | 0.195 | 0.195 | 22.855 | 7008863  |
| 12 | rs1464054  | rs35063    | 26406081  | 31153037  | 0.045 | 0.195 | 0.195 | 5.276  | 4746956  |
| 12 | rs500037   | rs4126012  | 118139540 | 119064852 | 0.053 | 0.195 | 0.189 | 2.093  | 925312   |
| 12 | rs1847461  | rs7301434  | 91077508  | 92856031  | 0.028 | 0.195 | 0.188 | 2.078  | 1778523  |
| 12 | rs6487136  | rs10845052 | 8605216   | 10295622  | 0.053 | 0.195 | 0.190 | 1.508  | 1690406  |
| 12 | rs10842189 | rs3922562  | 23759406  | 24358865  | 0.003 | 0.195 | 0.186 | 1.203  | 599459   |
| 12 | rs310796   | rs10161149 | 77453226  | 78075142  | 0.020 | 0.195 | 0.179 | 1.163  | 621916   |

|    |            |            |           |           |       |       |       |         |          |
|----|------------|------------|-----------|-----------|-------|-------|-------|---------|----------|
| 12 | rs1587458  | rs9325144  | 33252638  | 39018673  | 0.013 | 0.195 | 0.180 | 0.675   | 5766035  |
| 12 | rs1482434  | rs9943826  | 84589672  | 84945039  | 0.006 | 0.018 | 0.014 | 0.240   | 355367   |
| 12 | rs2370405  | rs17045250 | 78614718  | 78782912  | 0.005 | 0.037 | 0.030 | 0.219   | 168194   |
| 12 | rs7137869  | rs708893   | 119989646 | 119991312 | 0.195 | 0.195 | 0.195 | 0.005   | 1666     |
| 13 | rs9316335  | rs10492715 | 21958918  | 108133693 | 0.003 | 0.432 | 0.218 | 111.026 | 86174775 |
| 13 | rs7996418  | rs9549575  | 112882015 | 113512331 | 0.034 | 0.195 | 0.182 | 2.228   | 630316   |
| 13 | rs406801   | rs331974   | 109487337 | 110319113 | 0.008 | 0.195 | 0.190 | 1.486   | 831776   |
| 13 | rs7989816  | rs9805752  | 114070793 | 114876429 | 0.059 | 0.195 | 0.184 | 1.338   | 805636   |
| 13 | rs3936159  | rs4907674  | 112535799 | 112852673 | 0.031 | 0.195 | 0.187 | 0.743   | 316874   |
| 14 | rs1540427  | rs1544317  | 87762614  | 107281980 | 0.068 | 0.197 | 0.195 | 39.308  | 19519366 |
| 14 | rs2319870  | rs1950231  | 22034624  | 40659684  | 0.071 | 0.432 | 0.209 | 30.017  | 18625060 |
| 14 | rs2215837  | rs7146567  | 78856784  | 79032690  | 0.004 | 0.040 | 0.034 | 0.298   | 175906   |
| 15 | rs7175950  | rs7181323  | 78236353  | 95113239  | 0.001 | 0.260 | 0.196 | 29.266  | 16876886 |
| 15 | rs631864   | rs7164165  | 70376441  | 71784536  | 0.033 | 0.195 | 0.189 | 2.416   | 1408095  |
| 15 | rs7169915  | rs4966036  | 98892286  | 99429749  | 0.045 | 0.112 | 0.104 | 1.945   | 537463   |
| 15 | rs11632769 | rs1913426  | 33215074  | 33555802  | 0.005 | 0.195 | 0.177 | 1.633   | 340728   |
| 15 | rs2077422  | rs6495662  | 34191286  | 34630582  | 0.006 | 0.195 | 0.174 | 0.964   | 439296   |
| 15 | rs892775   | rs951442   | 33824530  | 33917942  | 0.022 | 0.083 | 0.077 | 0.262   | 93412    |
| 16 | rs7193424  | rs11645438 | 25887889  | 48493721  | 0.012 | 0.411 | 0.218 | 8.069   | 22605832 |
| 16 | rs8466     | rs2269911  | 97354     | 3065924   | 0.016 | 0.366 | 0.209 | 7.796   | 2968570  |
| 16 | rs6540278  | rs11646219 | 85620902  | 87096577  | 0.018 | 0.197 | 0.194 | 5.236   | 1475675  |
| 16 | rs8056635  | rs1468609  | 5234055   | 6428783   | 0.004 | 0.431 | 0.232 | 4.074   | 1194728  |
| 16 | rs2035247  | rs6500936  | 7069056   | 7270582   | 0.006 | 0.195 | 0.184 | 0.441   | 201526   |
| 16 | rs1364230  | rs198017   | 62628710  | 63131263  | 0.017 | 0.054 | 0.046 | 0.164   | 502553   |
| 17 | rs6502246  | rs2165894  | 13183901  | 19489796  | 0.192 | 0.394 | 0.205 | 11.915  | 6305895  |
| 17 | rs2188729  | rs938299   | 59669134  | 63148473  | 0.004 | 0.195 | 0.184 | 3.093   | 3479339  |
| 17 | rs9303193  | rs8079279  | 5432405   | 5993315   | 0.019 | 0.196 | 0.181 | 2.890   | 560910   |
| 17 | rs3785602  | rs756944   | 66356883  | 67531235  | 0.004 | 0.195 | 0.184 | 1.796   | 1174352  |
| 17 | rs7405782  | rs658591   | 21490090  | 26610769  | 0.045 | 0.195 | 0.190 | 1.544   | 5120679  |
| 17 | rs17728713 | rs17635849 | 52000506  | 52848767  | 0.004 | 0.167 | 0.146 | 0.497   | 848261   |

|    |            |            |           |           |       |       |       |         |          |
|----|------------|------------|-----------|-----------|-------|-------|-------|---------|----------|
| 18 | rs12457331 | rs11662742 | 277763    | 10676435  | 0.004 | 0.432 | 0.262 | 34.936  | 10398672 |
| 18 | rs592921   | rs12960632 | 74089533  | 78015180  | 0.101 | 0.195 | 0.195 | 9.645   | 3925647  |
| 18 | rs4334403  | rs11151425 | 64898303  | 65808846  | 0.081 | 0.195 | 0.192 | 1.499   | 910543   |
| 18 | rs1791520  | rs1668852  | 22118315  | 22516866  | 0.073 | 0.168 | 0.161 | 0.755   | 398551   |
| 18 | rs10502537 | rs1442998  | 27502730  | 28066601  | 0.007 | 0.195 | 0.178 | 0.359   | 563871   |
| 19 | rs791464   | rs917649   | 1489080   | 56924761  | 0.010 | 0.432 | 0.257 | 106.684 | 55435681 |
| 19 | rs4801531  | rs931258   | 58401560  | 58808709  | 0.026 | 0.195 | 0.180 | 0.403   | 407149   |
| 20 | rs1418258  | rs6037988  | 63799     | 4830412   | 0.014 | 0.204 | 0.195 | 14.146  | 4766613  |
| 20 | rs6069788  | rs864184   | 55149352  | 58326432  | 0.092 | 0.195 | 0.194 | 8.711   | 3177080  |
| 20 | rs6125111  | rs6127552  | 36092914  | 36879360  | 0.004 | 0.195 | 0.180 | 1.658   | 786446   |
| 20 | rs1884034  | rs6072705  | 40608629  | 40999761  | 0.054 | 0.185 | 0.155 | 1.050   | 391132   |
| 20 | rs6106154  | rs6046790  | 19883823  | 20303376  | 0.048 | 0.195 | 0.186 | 0.982   | 419553   |
| 20 | rs1204759  | rs761685   | 49757406  | 49940226  | 0.069 | 0.146 | 0.134 | 0.759   | 182820   |
| 20 | rs6141319  | rs853849   | 31144807  | 31439355  | 0.078 | 0.195 | 0.182 | 0.327   | 294548   |
| 20 | rs6058224  | rs6087733  | 33881774  | 34298628  | 0.071 | 0.194 | 0.179 | 0.027   | 416854   |
| 21 | rs3787751  | rs2839378  | 38160163  | 48084989  | 0.162 | 0.432 | 0.221 | 34.781  | 9924826  |
| 21 | rs2510527  | rs2833092  | 31577206  | 32168483  | 0.043 | 0.195 | 0.175 | 0.755   | 591277   |
| 21 | rs2834426  | rs11701051 | 35631938  | 35839963  | 0.030 | 0.135 | 0.114 | 0.561   | 208025   |
| 21 | rs2192160  | rs1153304  | 15588213  | 15660539  | 0.036 | 0.067 | 0.062 | 0.258   | 72326    |
| 22 | rs2226691  | rs929020   | 26789849  | 47971041  | 0.025 | 0.201 | 0.195 | 39.819  | 21181192 |
| 22 | rs6004814  | rs137183   | 26290588  | 26670085  | 0.106 | 0.194 | 0.189 | 1.163   | 379497   |
| 22 | rs137916   | rs2272843  | 50491713  | 50599466  | 0.005 | 0.124 | 0.099 | 0.433   | 107753   |
| X  | rs2240584  | rs2704838  | 7883894   | 24179042  | 0.153 | 0.467 | 0.465 | 26.838  | 16295148 |
| X  | rs2404538  | rs204332   | 110242674 | 126158857 | 0.007 | 0.467 | 0.463 | 24.337  | 15916183 |
| X  | rs5987005  | rs557132   | 153892867 | 154929412 | 0.283 | 0.402 | 0.384 | 2.031   | 1036545  |
| X  | rs12557174 | rs5953334  | 48117763  | 49443185  | 0.074 | 0.467 | 0.419 | 1.375   | 1325422  |
| X  | rs221406   | rs3850163  | 27555758  | 28445637  | 0.193 | 0.383 | 0.352 | 0.591   | 889879   |
| X  | rs5970389  | rs6526155  | 152021096 | 152226542 | 0.030 | 0.230 | 0.208 | 0.403   | 205446   |

**Table S2. Candidate Variants in the Linked Regions Shared by Individuals III-1, III-2, and III-4**

| Gene           | RefSeq      | Chr | Variation                    | dbSNP ID    | Segregation <sup>a</sup> | In Unaffected Family Members | In Healthy Controls | In Silico Predictions <sup>b</sup> | LOH <sup>c</sup> in Tumors |
|----------------|-------------|-----|------------------------------|-------------|--------------------------|------------------------------|---------------------|------------------------------------|----------------------------|
| <i>CTRC</i>    | NM_007272.2 | 1   | c.674A>C<br>(p.Glu225Ala)    | rs201486613 | yes                      | yes                          | 0/187               | -                                  | -                          |
| <i>SSFA2</i>   | NM_006751.5 | 2   | c.2393C>T<br>(p.Ser798Leu)   | rs201543593 | no                       | -                            | -                   | -                                  | -                          |
| <i>METAP1D</i> | NM_199227.1 | 2   | c.653T>C<br>(p.Ile218Thr)    | rs200008075 | no                       | -                            | -                   | -                                  | -                          |
| <i>ZNF80</i>   | NM_007136.3 | 3   | c.169G>A<br>(p.Val57Met)     | rs146464395 | yes                      | yes                          | 0/182               | -                                  | -                          |
| <i>PDCD2</i>   | NM_002598.3 | 6   | c.725A>G<br>(p.Gln242Arg)    | rs202247759 | no                       | -                            | -                   | -                                  | -                          |
| <i>TNXB</i>    | NM_019105.6 | 6   | c.12716C>T<br>(p.Ala4239Val) | rs202247763 | no                       | -                            | -                   | -                                  | -                          |
| <i>AASS</i>    | NM_005763.3 | 7   | c.1990T>C<br>(p.Ser664Pro)   | rs202247760 | yes                      | no                           | 0/174               | tolerated                          | 0/7                        |
| <i>POLR1E</i>  | NM_022490.1 | 9   | c.994A>G<br>(p.Met332Val)    | rs144866314 | no                       | -                            | -                   | -                                  | -                          |
| <i>IFIT2</i>   | NM_001547.4 | 10  | c.1334A>G<br>(p.Lys445Arg)   | rs138979563 | yes                      | -                            | 3/69                | -                                  | -                          |
| <i>SUFU</i>    | NM_016169.3 | 10  | c.367C>T<br>(p.Arg123Cys)    | rs202247756 | yes                      | no                           | 0/180               | damaging                           | 7/7                        |
| <i>ACAD8</i>   | NM_014384.2 | 11  | c.1007C>T<br>(p.Ala336Val)   | rs202247761 | no                       | -                            | -                   | -                                  | -                          |
| <i>NCAPD3</i>  | NM_015261.2 | 11  | c.4342C>T                    | rs140724102 | no                       | -                            | -                   | -                                  | -                          |



|                  |             |    |                             |             |     |   |      |   |   |
|------------------|-------------|----|-----------------------------|-------------|-----|---|------|---|---|
| <i>KL</i>        | NM_004795.3 | 13 | (p.Arg1448Trp)<br>c.1160G>A | rs200112661 | yes | - | 1/90 | - | - |
| <i>SERPINA12</i> | NM_173850.2 | 14 | (p.Arg387His)<br>c.1118C>T  | rs138209155 | yes | - | 1/89 | - | - |
| <i>C14orf102</i> | NM_017970.2 | 14 | (p.Gln642*)<br>c.1924C>T    | rs200542150 | no  | - | -    | - | - |
| <i>ARNT2</i>     | NM_014862.3 | 15 | (p.Gln569>His)<br>c.1707G>T | rs145379118 | no  | - | -    | - | - |
| <i>ZNF491</i>    | NM_152356.3 | 19 | (p.Arg232Met)<br>c.695G>T   | rs142223398 | no  | - | -    | - | - |
| <i>ARHGAP33</i>  | NM_052948.3 | 19 | (p.Thr504Ile)<br>c.1511C>T  | rs140445323 | no  | - | -    | - | - |
| <i>PHEX</i>      | NM_000444.4 | X  | (p.Asn301His)<br>c.901A>C   | rs199893153 | no  | - | -    | - | - |
| <i>KLHL15</i>    | NM_030624.2 | X  | (p.Pro510Ser)<br>c.1528C>T  | rs202247762 | no  | - | -    | - | - |

<sup>a)</sup> With the meningiomas in Family 1.

<sup>b)</sup> With Polyphen2 and SIFT.

<sup>c)</sup> Loss of Heterozygosity.

**Table S3. Primers for *SUFU* PCR, Sequencing, and Site-Directed Mutagenesis**

| <b>Exon nro</b> | <b>Primer Sequence (5'-3')</b> | <b>Reverse Primer Sequence (5'-3')</b> | <b>Product Size (bp)</b> | <b>Sample Material</b> |
|-----------------|--------------------------------|----------------------------------------|--------------------------|------------------------|
| 1               | GTCAGTGCTCTCCCCGTC             | CCACAAATTACTTCGCCCTC                   | 321                      | DNA <sup>a</sup>       |
| 2               | TCTGGAGAGATGTGGCCTCT           | GGTTCACGGAGAAGTACCA                    | 388                      | DNA <sup>a</sup>       |
| 3               | TTGGATACTGAGGCCACCAT           | AAGGCCACTCCACAAACATC                   | 341                      | DNA <sup>a</sup>       |
| 4               | CATCCGGAGTGAATGCTTCT           | AACCTCCCCTCCCTTCACT                    | 388                      | DNA <sup>a</sup>       |
| 5               | CAGAGAGCCTGGGTAGCTGA           | CCCCACATGGAGGGTAGTG                    | 242                      | DNA <sup>a</sup>       |
| 6               | CAAACAGGGCAGGCTGTAG            | CCTCTGTTTTCCCAGGATGA                   | 239                      | DNA <sup>a</sup>       |
| 7               | TAAGAGCAGTGGCTGAAAGG           | CCCTGCTGGAAGACTTCACT                   | 393                      | DNA <sup>a</sup>       |
| 8               | GCTGAGCCAGGTTTCAAGAG           | TCTCTCATGCAATCCACAGG                   | 273                      | DNA <sup>a</sup>       |
| 9               | TGAGAAGTGCTTGGTGCAGT           | CTGGGGAGGCTCTGAAGTG                    | 398                      | DNA <sup>a</sup>       |
| 10              | TAGTCCCCACTGTCCCAGAG           | CATGAGGCATTCATGACCAG                   | 356                      | DNA <sup>a</sup>       |
| 11              | TCCTCCATGGTCAGAAGAGAG          | ACATGCATGCACAGACGTG                    | 250                      | DNA <sup>a</sup>       |
| 12              | GGCAATCTCTGGAAAGACCA           | CGCAGTCTTCCTCACACTTG                   | 283                      | DNA <sup>a</sup>       |
| 2-I             | CCAGGATGGGTCCCTTTAGGT          | AGATCACTCAGGCCGAAGC                    | 210                      | DNA <sup>b</sup>       |
| 2-II            | CCAGACCCCTTGGACTATGT           | GCTCAGGAAGACCTCAGGAA                   | 182                      | DNA <sup>b</sup>       |
| 3-I             | CTGAGGCCACCATAAAAAGG           | CCAAGCCCTGCATTAAGTCT                   | 214                      | DNA <sup>b</sup>       |
| 3-II            | GGCTTTGAGTTGACCTTTTCG          | AAGGCCACTCCACAAACATC                   | 205                      | DNA <sup>b</sup>       |
| 4-I             | AGCCTGGGCTAGTGAGATCC           | AACTACCCCAAAGGGTGTCTG                  | 216                      | DNA <sup>b</sup>       |
| 4-II            | TTCTGCAGTGGGGACCAT             | CTTCACTCCCCCTCCTCAA                    | 220                      | DNA <sup>b</sup>       |
| 5               | TGGGTAGCTGACCTTCTTGG           | GGAGGGTAGTGGAGGGACTC                   | 225                      | DNA <sup>b</sup>       |
| 6               | AAACAGGGCAGGCTGTAGG            | CCTCTGTTTTCCCAGGATGA                   | 238                      | DNA <sup>b</sup>       |
| 7-I             | AGTGGCTGAAAGGGTGGTC            | CTGTGTGCCGATGCAGAT                     | 207                      | DNA <sup>b</sup>       |
| 7-II            | TGACAAAGGCATCGAGACAG           | CCTGGGGAAAAGGAAGGA                     | 199                      | DNA <sup>b</sup>       |
| 8-I             | CTGCTGAGCCAGGTTTCAAG           | GGACACTGGGGAACTTACGG                   | 212                      | DNA <sup>b</sup>       |
| 8-II            | GGGCAACTTAGTGGTGTTCGT          | TCTCTCATGCAATCCACAGG                   | 218                      | DNA <sup>b</sup>       |
| 9-II            | ACAGCCTGGAAAGTGACAGC           | CTGGGGAGGCTCTGAAGTG                    | 206                      | DNA <sup>b</sup>       |
| 10-I            | TAGTCCCCACTGTCCCAGAG           | GCGTAAGGATGCTCCTCAGT                   | 211                      | DNA <sup>b</sup>       |

|       |                           |                          |     |                    |
|-------|---------------------------|--------------------------|-----|--------------------|
| 10-II | GTCTCCATGTTCCCATCTCC      | GGTGGGCAAGGAAGTCTATG     | 211 | DNA <sup>b</sup>   |
| 11    | TTGGTGGTTGGCAAAAAGAT      | ACATGCATGCACAGACGTG      | 216 | DNA <sup>b</sup>   |
| 12    | CTCTGGAAAGACCACGGTGTA     | GGAAGTCACTGGGGAGCAG      | 220 | DNA <sup>b</sup>   |
|       | GTTTTGGTGGTTTTGGCTTTGAGTT | CTCTTCAGACAAAAGGTCAACTCA |     | cDNA               |
| 3     | GACCTTTTGTCTGAAGAG        | AAGCCAAAACCACCAAAC       | 215 | clone <sup>c</sup> |
|       |                           |                          |     | cDNA               |
| 1     | CCGTAGATGGCGTGCAGT        | -                        | -   | clone <sup>d</sup> |
|       |                           |                          |     | cDNA               |
| 4     | -                         | AACTACCCCAAAGGGTGTCTG    | -   | clone <sup>d</sup> |
|       |                           |                          |     | cDNA               |
| 3     | GGCTTTGAGTTGACCTTTCG      | -                        | -   | clone <sup>d</sup> |
|       |                           |                          |     | cDNA               |
| 3     | TTCTGCAGTGGGGACCAT        | -                        | -   | clone <sup>d</sup> |
|       |                           |                          |     | cDNA               |
| 7     | -                         | CTGTGTGCCGATGCAGAT       | -   | clone <sup>d</sup> |
|       |                           |                          |     | cDNA               |
| 7     | TGACAAAGGCATCGAGACAG      | -                        | -   | clone <sup>d</sup> |
|       |                           |                          |     | cDNA               |
| 9     | ACAGCCTGGAAAGTGACAGC      | -                        | -   | clone <sup>d</sup> |
|       |                           |                          |     | cDNA               |
| 12    | -                         | GGAAGTCACTGGGGAGCAG      | -   | clone <sup>d</sup> |

<sup>a)</sup> Primers for Lymphocyte DNA.

<sup>b)</sup> Primers for FFPE DNA.

<sup>c)</sup> Primers for site-directed mutagenesis of the human *SUFU* cDNA clone.

<sup>d)</sup> Primers for sequencing of the human *SUFU* cDNA clone.

**Table S4. All *SUFU* Variants Identified in the 162 Individuals with Meningioma**

| Exon Number | dbSNP ID    | Nucleotide Change | Individuals with a Heterozygous Variant <sup>a</sup> | Individuals with a Homozygous Variant <sup>a</sup> |
|-------------|-------------|-------------------|------------------------------------------------------|----------------------------------------------------|
| 1           | rs2274351   | c.182+16C>T       | 16/40                                                | 0/40                                               |
|             |             |                   | 47/77                                                | 10/77                                              |
|             |             |                   | 1/4                                                  | 1/4                                                |
|             |             |                   | nd                                                   | nd                                                 |
| 2           | rs2281879   | c.183-49G>C       | 16/40                                                | 0/40                                               |
|             |             |                   | 38/76                                                | 4/76                                               |
|             |             |                   | 2/4                                                  | 0/4                                                |
|             |             |                   | 8/39                                                 | 5/39                                               |
| 2           | rs67595177  | c.183-67delG      | 6/40                                                 | 0/40                                               |
|             |             |                   | 12/76                                                | 0/76                                               |
|             |             |                   | 2/4                                                  | 0/4                                                |
|             |             |                   | 6/39                                                 | 0/39                                               |
| 2           | rs138784497 | c.317+59G>A       | 0/40                                                 | 0/40                                               |
|             |             |                   | 1/76                                                 | 0/76                                               |
|             |             |                   | 0/4                                                  | 0/4                                                |

|   |             |              |       |      |
|---|-------------|--------------|-------|------|
|   |             |              | nd    | nd   |
| 3 | rs117807100 | c.454+45G>T  | 1/40  | 0/40 |
|   |             |              | 2/77  | 0/77 |
|   |             |              | 0/4   | 0/4  |
|   |             |              | nd    | nd   |
| 7 | rs202247757 | c.910+14C>T  | 1/40  | 0/40 |
|   |             |              | 0/76  | 0/76 |
|   |             |              | 0/4   | 0/4  |
|   |             |              | 0/40  | 0/40 |
| 8 | rs3824756   | c.1022+49T>C | 5/40  | 0/40 |
|   |             |              | 10/77 | 0/77 |
|   |             |              | 3/4   | 0/4  |
|   |             |              | 2/40  | 0/40 |
| 9 | rs202247758 | c.1023-28C>T | 0/40  | 0/40 |
|   |             |              | 1/76  | 0/76 |
|   |             |              | 0/4   | 0/4  |
|   |             |              | nd    | nd   |
| 9 | rs117407459 | c.1023-23C>G | 0/40  | 0/40 |

|    |            |              |       |       |
|----|------------|--------------|-------|-------|
|    |            |              | 2/76  | 0/76  |
|    |            |              | 0/4   | 0/4   |
|    |            |              | nd    | nd    |
| 11 | rs12414407 | c.1365+19T>C | 16/40 | 18/40 |
|    |            |              | 1/76  | 0/76  |
|    |            |              | 3/4   | 0/4   |
|    |            |              | 11/40 | 10/40 |
| 11 | rs17114803 | c.1299T>C    | 4/40  | 1/40  |
|    |            | (p.Ile433=)  | 1/76  | 0/76  |
|    |            |              | 2/4   | 0/4   |
|    |            |              | 3/40  | 0/40  |
| 12 | rs4917980  | c.1455+20T>G | 0/40  | 0/40  |
|    |            |              | 0/77  | 77/77 |
|    |            |              | 0/4   | 3/4   |
|    |            |              | 0/40  | 23/40 |

---

<sup>a)</sup>The uppermost numbers denote the UK meningioma cases, the second numbers denote Finnish meningioma cases recruited in the Interphone study group<sup>1</sup>, the third numbers denote Finnish *NF2* negative multiple meningioma cases, and the numbers at the bottom denote FFPE meningioma tumors collected through a search into Finnish Cancer Registry.

## Reference

1. Bethke, L., Murray, A., Webb, E., Schoemaker, M., Muir, K., McKinney, P., Hepworth, S., Dimitropoulou, P., Lophatananon, A., Feyshting, M. et al. (2008). Comprehensive analysis of DNA repair gene variants and risk of meningioma. *J. Natl. Cancer Inst.* 100, 270-276.
